# Supplementary material for: Direct Observation of the Interconversion of Normal and Toxic Forms of α-Synuclein
Source: PubMed Central journal article supplement (PMC3383996; doi:10.1016/j.cell.2012.03.037), 2012-05-25
Supplement: mmc1.pdf [file mmc1.pdf]

**Table S1. Relative Percentage of the Different Oligomeric Classes, Related to Figure 4**

| <b>Oligomer class:</b>           | <b>A<sub>small</sub></b> | <b>A<sub>med</sub></b> | <b>B<sub>med</sub></b> | <b>B<sub>large</sub></b> |
|----------------------------------|--------------------------|------------------------|------------------------|--------------------------|
| <b>Late aggregation time</b>     | <b>28 ± 4</b>            | <b>20 ± 1</b>          | <b>27 ± 1</b>          | <b>25 ± 2</b>            |
| <b>Early disaggregation time</b> | <b>48 ± 12</b>           | <b>9 ± 8</b>           | <b>31 ± 15</b>         | <b>11 ± 2</b>            |
